# Supplementary material for: Common misconceptions and myths about ovarian cancer causation: a national cross-sectional study from palestine
Source: BMC Public Health. 2024 Apr 12;24:1027. doi: 10.1186/s12889-024-18437-6 (PMC11015600; doi:10.1186/s12889-024-18437-6)
Supplement: Supplementary file 3 — Supplementary Material 3 [file 12889_2024_18437_MOESM3_ESM.docx]

# Common Misconceptions and Myths About Ovarian Cancer Causation: A National Cross-sectional Study from Palestine

Mohamedraed Elshami1,2*, Inas Jaber, MD3*, Mohammed Alser, MD 4, Ibrahim Al-Slaibi, MD5, Hadeel Jabr, MD2, Sara Ubaiat6, Aya Tuffaha, MD7, Salma Khader3, Reem Khraishi8, Zeina Abu Arafeh3, Sondos Al-Madhoun9, Aya Alqattaa10, Areej Yaseen3, Asmaa Abd El Hadi10, Ola Barhoush3, Maysun Hijazy10, Tamara Eleyan3, Amany Alser9, Amal Abu Hziema10, Amany Shatat10, Falasteen Almakhtoob11, Balqees Mohamad, MD12,Walaa Farhat13, Yasmeen Abuamra14, Hanaa Mousa10,Reem Adawi3, Alaa Musallam, MD15, Shurouq I. Albarqi, PharmB16, Nasser Abu-El-Noor, PhD17#,and Bettina Bottcher, MD, PhD10#

*Contributed equally as a first co-author.

#Contributed equally as a senior co-author.

1Division of Surgical Oncology, University Hospitals Cleveland Medical Center, Cleveland, OH 44106

2Ministry of Health, Gaza, Palestine.

3Faculty of Medicine, Al-Quds University, Jerusalem, Palestine.

4 United Nations Relief and Works Agency for Palestine Refugees (UNRWA), Gaza, Palesine.

5Almakassed Hospital, Jerusalem, Palestine.

6Faculty of Medicine, Al-Quds University, Bethlehem, Palestine.

7Al-Watani Hospital, Nablus, Palestine

8Faculty of Medicine, An-Najah National University, Nablus, Palestine.

9Al-shiffa Hospital, Gaza, Palestine.

10 Faculty of Medicine, Islamic University of Gaza, Gaza, Palestine

11Facultyof Medicine, Palestine Polytechnic University, Hebron, Palestine.

12 Doctors Without Borders (Médecins Sans Frontières), Hebron, Palestine.

13Faculty of Medicine, Al-Quds University, Jenin, Palestine.

14 Faculty of Medicine, Al-Azhar University-Gaza, Gaza, Palestine.

15Al-Aqsa Hospital, Deir Albalah, Palestine.

16 Faculty of Pharmacy, Al-Azhar University of Gaza, Gaza, Palestine.

17Faculty of Nursing, Islamic University of Gaza, Gaza, Palestine

**Corresponding author**

Mohamedraed Elshami, MD, MMSc

Division of Surgical Oncology

Department of Surgery

University Hospitals Cleveland Medical Center

11100 Euclid Avenue, Lakeside 7100

Cleveland, OH 44106

Phone: 832-245-6055

Email: mohamedraed.elshami@gmail.com

AOR= adjusted odds ratio, CI= confidence interval, WBJ= West Bank and Jerusalem.
*Adjusted for age-group, educational level, occupation, monthly income, marital status, residency, having a chronic disease, knowing someone with cancer, and site of data collection.

Supplementary table 3: Multivariable logistic regression analyzing factors associated with the recognition of each other mythical cause of ovarian cancer.

AOR= adjusted odds ratio, CI= confidence interval, WBJ= West Bank and Jerusalem.
*Adjusted for age-group, educational level, occupation, monthly income, marital status, residency, having a chronic disease, knowing someone with cancer, and site of data collection.

| **Characteristic** | **Having a physical trauma** | | **Using aerosol containers** | | **Using cleaning products** | | **Feeling stressed** | |
| --- | --- | --- | --- | --- | --- | --- | --- | --- |
| **AOR (95% CI)*** | **p-value** | **AOR (95% CI)*** | **p-value** | **AOR (95% CI)*** | **p-value** | **AOR (95% CI)*** | **p-value** |
| **Age group**  18 to 44  45 or older | Ref  0.91 (0.78- 1.05) | Ref  0.20 | Ref  0.72 (0.62- 0.84) | Ref  <0.001 | Ref  0.79 (0.67- 0.92) | Ref  0.003 | Ref  0.78 (0.66- 0.92) | Ref  0.003 |
| **Educational level**  Secondary or below  Post–secondary | Ref  1.10 (0.97- 1.25) | Ref  0.14 | Ref  1.06 (0.93- 1.20) | Ref  0.36 | Ref  0.85 (0.74- 0.97) | Ref  0.014 | Ref  0.89 (0.77- 1.02) | Ref  0.09 |
| **Occupation**  Unemployed/housewife  Employed  Retired  Student | Ref  0.87 (0.74- 1.02)  0.88 (0.48- 1.60)  1.03 (0.83- 1.29) | Ref  0.09  0.67  0.79 | Ref  0.79 (0.67- 0.93)  0.85 (0.45- 1.61)  1.05 (0.85- 1.32) | Ref  0.005  0.62  0.64 | Ref  0.90 (0.76- 1.07)  0.64 (0.30- 1.34)  1.32 (1.05- 1.66) | Ref  0.25  0.24  0.017 | Ref  0.98 (0.82- 1.17)  1.01 (0.50- 2.03)  0.96 (0.76- 1.22) | Ref  0.79  0.98  0.74 |
| **Monthly income**  < 1450 NIS  ≥ 1450 NIS | Ref  1.11 (0.94- 1.30) | Ref  0.23 | Ref  1.04 (0.88- 1.23) | Ref  0.62 | Ref  0.96 (0.80- 1.14) | Ref  0.62 | Ref  1.07 (0.90- 1.28) | Ref  0.46 |
| **Marital status**  Single  Married  Divorced/Widowed | Ref  1.28 (1.08- 1.50)  1.13 (0.83- 1.55) | Ref  0.003  0.44 | Ref  0.86 (0.73- 1.01)  0.85 (0.61- 1.18) | Ref  0.07  0.33 | Ref  0.92 (0.77- 1.10)  0.93 (0.66- 1.31) | Ref  0.36  0.70 | Ref  0.90 (0.76- 1.06)  0.67 (0.46- 0.98) | Ref  0.26  0.038 |
| **Residency**  Gaza Strip  WBJ | Ref  0.74 (0.63- 0.86) | Ref  <0.001 | Ref  1.28 (1.08- 1.51) | Ref  0.004 | Ref  1.01 (0.85- 1.20) | Ref  0.91 | Ref  0.91 (0.76- 1.09) | Ref  0.29 |
| **Having a chronic disease**  No  Yes | Ref  0.92 (0.79- 1.07) | Ref  0.29 | Ref  0.89 (0.76- 1.04) | Ref  0.14 | Ref  0.99 (0.84- 1.16) | Ref  0.90 | Ref  0.93 (0.79- 1.10) | Ref  0.40 |
| **Knowing someone with cancer**  No  Yes | Ref  1.33 (1.19- 1.49) | Ref  <0.001 | Ref  1.03 (0.92- 1.15) | Ref  0.61 | Ref  0.94 (0.84- 1.06) | Ref  0.31 | Ref  0.96 (0.85- 1.08) | Ref  0.52 |
| **Site of data collection**  Public Spaces  Hospitals  Primary healthcare centers | Ref  0.88 (0.77- 1.02)  0.79 (0.69- 0.90) | Ref  0.09  0.001 | Ref  0.94 (0.81- 1.08)  0.87 (0.75- 1.00) | Ref  0.38  0.050 | Ref  1.05 (0.90- 1.23)  0.99 (0.85- 1.15) | Ref  0.51  0.88 | Ref  1.08 (0.93- 1.26)  0.77 (0.66- 0.90) | Ref  0.31  0.001 |

Supplementary table 3: Multivariable logistic regression analyzing factors associated with the recognition of each other mythical cause of ovarian cancer. (Ctd)

| **Characteristic** | **Living near power lines** | | **Exposure to electromagnetic frequencies** | | **Using mobile phones** | |
| --- | --- | --- | --- | --- | --- | --- |
| **AOR (95% CI)*** | **p-value** | **AOR (95% CI)*** | **p-value** | **AOR (95% CI)*** | **p-value** |
| **Age group**  18 to 44  45 or older | Ref  0.76 (0.63- 0.91) | Ref  0.002 | Ref  1.03 (0.87- 1.22) | Ref  0.75 | Ref  0.70 (0.58- 0.84) | Ref  <0.001 |
| **Educational level**  Secondary or below  Post–secondary | Ref  0.91 (0.79- 1.05) | Ref  0.20 | Ref  0.87 (0.75- 1.01) | Ref  0.06 | Ref  1.16 (1.00- 1.33) | Ref  0.047 |
| **Occupation**  Unemployed/housewife  Employed  Retired  Student | Ref  0.86 (0.71- 1.04)  0.68 (0.28- 1.65)  1.16 (0.91- 1.48) | Ref  0.12  0.40  0.24 | Ref  0.96 (0.80- 1.16)  0.64 (0.29- 1.40)  0.92 (0.72- 1.18) | Ref  0.66  0.26  0.52 | Ref  0.87 (0.72- 1.04)  1.26 (0.64- 2.50)  1.09 (0.86- 1.38) | Ref  0.13  0.51  0.46 |
| **Monthly income**  < 1450 NIS  ≥ 1450 NIS | Ref  0.94 (0.78- 1.13) | Ref  0.51 | Ref  0.83 (0.69- 1.00) | Ref  0.051 | Ref  1.03 (0.85- 1.25) | Ref  0.74 |
| **Marital status**  Single  Married  Divorced/Widowed | Ref  0.89 (0.74- 1.10)  0.71 (0.48- 1.05) | Ref  0.23  0.09 | Ref  0.77 (0.64- 0.93)  0.61 (0.42- 0.89) | Ref  0.007  0.011 | Ref  0.68 (0.56- 0.81)  0.57 (0.39- 0.85) | Ref  <0.0010.006 |
| **Residency**  Gaza Strip  WBJ | Ref  0.54 (0.45- 0.65) | Ref  <0.001 | Ref  1.03 (0.86- 1.24) | Ref  0.73 | Ref  1.23 (1.02- 1.49) | Ref  0.032 |
| **Having a chronic disease**  No  Yes | Ref  0.95 (0.79- 1.14) | Ref  0.57 | Ref  1.05 (0.88- 1.25) | Ref  0.58 | Ref  1.01 (0.84- 1.21) | Ref  0.95 |
| **Knowing someone with cancer**  No  Yes | Ref  1.21 (1.07- 1.38) | Ref  0.003 | Ref  0.99 (0.88- 1.12) | Ref  0.89 | Ref  0.99 (0.88- 1.13) | Ref  0.93 |
| **Site of data collection**  Public Spaces  Hospitals  Primary healthcare centers  AOR= adjusted odds ratio, CI= confidence interval, WBJ= West Bank and Jerusalem. *Adjusted for age-group, educational level, occupation, monthly income, marital status, residency, having a chronic disease, knowing someone with cancer, and site of data collection. | Ref  0.78 (0.66- 0.91)  0.64 (0.55- 0.75) | Ref  0.002  <0.001 | Ref  1.25 (1.07- 1.47)  0.80 (0.68- 0.94) | Ref  0.006  0.006 | Ref  0.71 (0.61- 0.84)  0.70 (0.60- 0.82) | Ref  <0.001<0.001 |
